# Supplementary material for: Zinc ion functional doping for all-inorganic planar CsPbIBr2 perovskite solar cells with efficiency over 10.5%
Source: Royal Society of Chemistry journal article supplement (doi:10.1039/d0tc05455k), 2020-12-29
Supplement: d0tc05455k1.pdf [file d0tc05455k1.pdf]

## Supporting Information

### **Zinc Ion Functional Doping for All-Inorganic Planar CsPbIBr<sub>2</sub> Perovskite Solar Cell with Efficiency over 10.5%**

Yongjin Long,<sup>a</sup> Chenyang Wang,<sup>a</sup> Xiaohui Liu,<sup>a\*</sup> Jiahao Wang,<sup>a</sup> Shiqiang Fu,<sup>a</sup> Jing Zhang,<sup>a</sup> Ziyang Hu,<sup>a</sup> Yuejin Zhu<sup>a,b\*</sup>

<sup>a</sup> Department of Microelectronic Science and Engineering, School of Physical Science and Technology, Ningbo Collaborative Innovation Center of Nonlinear Calamity System of Ocean and Atmosphere, Ningbo University, Ningbo, 315211, China

<sup>b</sup> School of Information Engineering, College of Science and Technology, Ningbo University, Ningbo, 315300, China

\* E-mail addresses: liuxiaohui@nbu.edu.cn; zhuyuejin@nbu.edu.cn

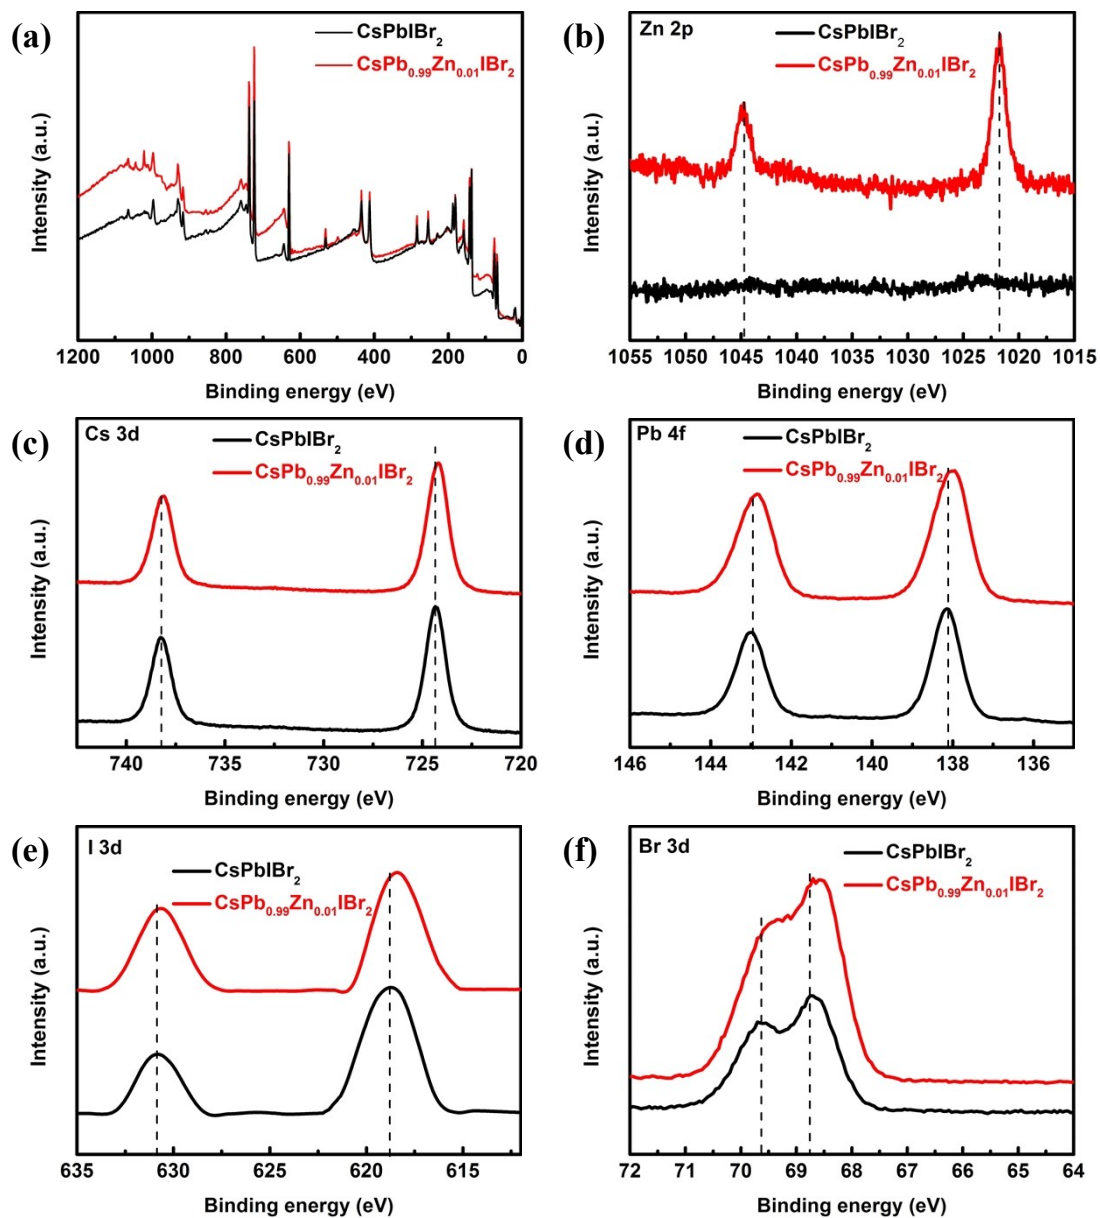

**Fig. S1.** a) XPS survey spectra of pristine  $\text{CsPbI}_3$  and  $\text{CsPb}_{0.99}\text{Zn}_{0.01}\text{I}_3$  films. b) Zn 2p, c) Cs 3d, d) Pb 4f, e) I 3d, and f) Br 3d XPS core spectra of pristine  $\text{CsPbI}_3$  and  $\text{CsPb}_{0.99}\text{Zn}_{0.01}\text{I}_3$  films, respectively.

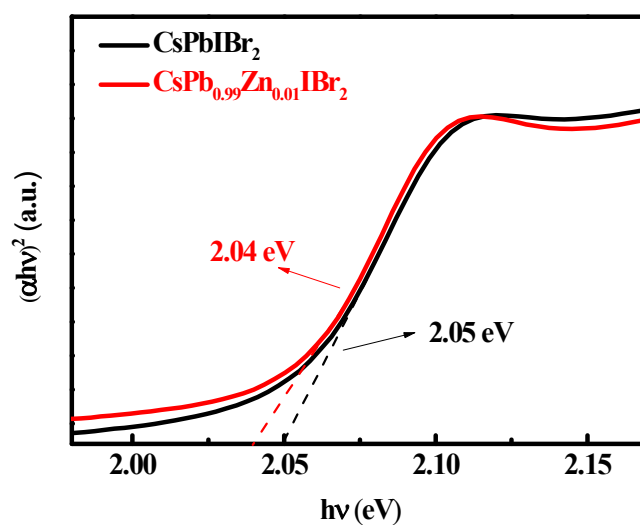

**Fig. S2.** Tauc plots of perovskite films obtained from UV-vis absorption spectra with equation  $(\alpha h\nu)^2 = A(h\nu - E_g)$ .

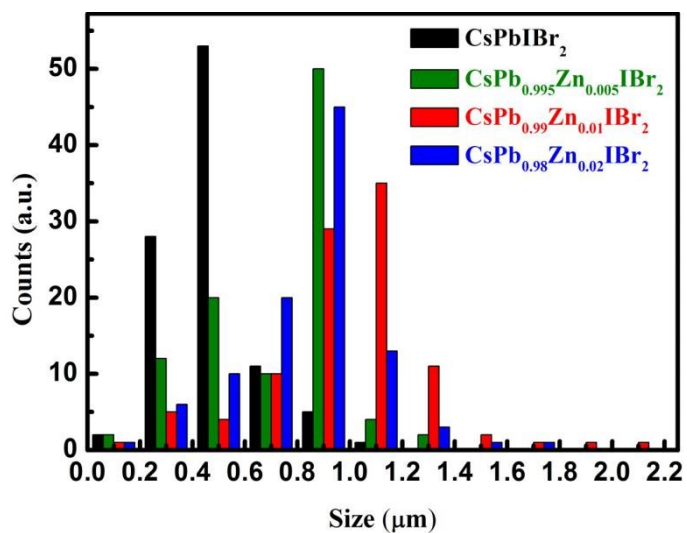

**Fig. S3.** Grain statistical distribution based on the SEM surface morphology images.

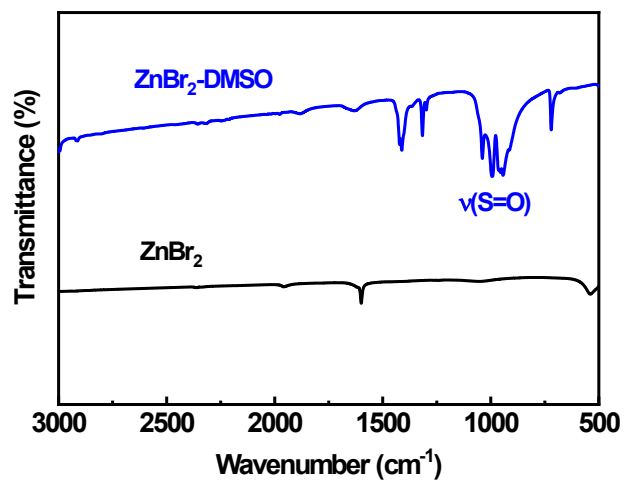

**Fig. S4** Fourier transform infrared spectrometer (FTIR) spectra of ZnBr<sub>2</sub> and ZnBr<sub>2</sub>-DMSO powders.

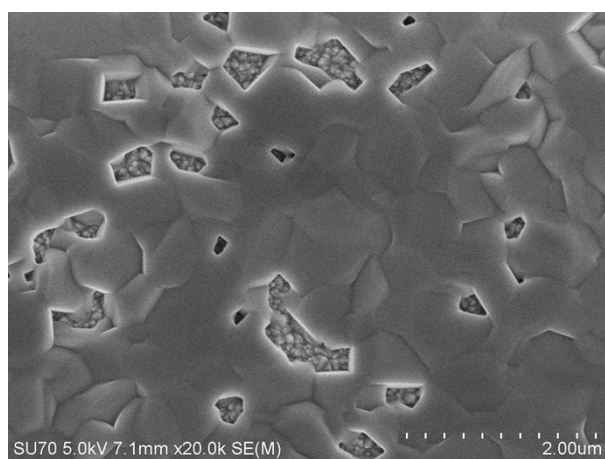

**Fig. S5.** The scanning electron microscope (SEM) image of the CsPb<sub>0.9</sub>Zn<sub>0.1</sub>IBr<sub>2</sub> perovskite film.

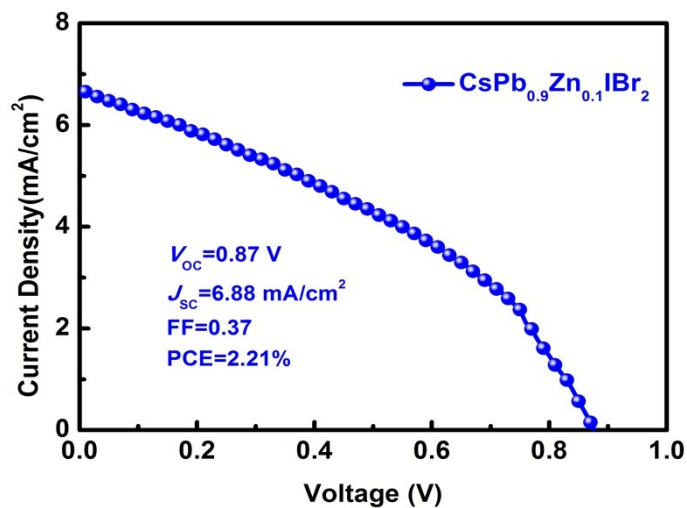

Fig. S6. The  $J$ - $V$  curve under RS of the  $\text{CsPb}_{0.9}\text{Zn}_{0.1}\text{IBr}_2$  and the corresponding data parameters.

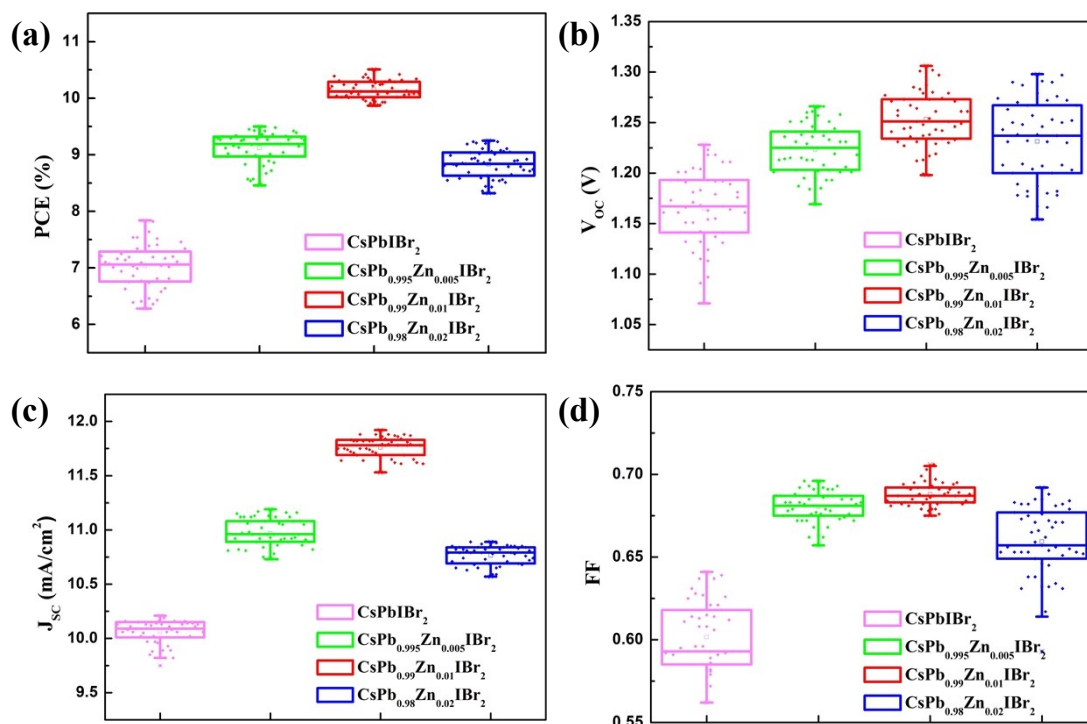

Fig. S7. a) PCE, b)  $V_{oc}$ , c)  $J_{sc}$ , and d) FF value distributions of  $\text{CsPbIBr}_2$ -based PSCs without and with different  $\text{Zn}^{2+}$  doping.

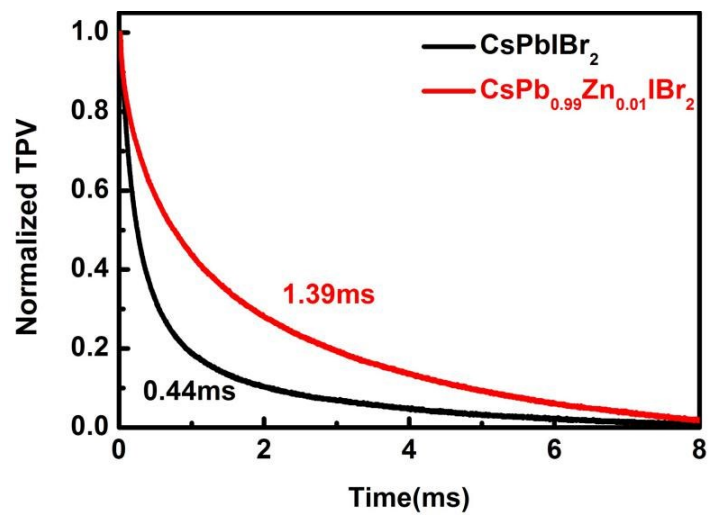

Fig. S8. TPV decay curves of the CsPbIBr<sub>2</sub> and CsPb<sub>0.99</sub>Zn<sub>0.01</sub>IBr<sub>2</sub> devices.

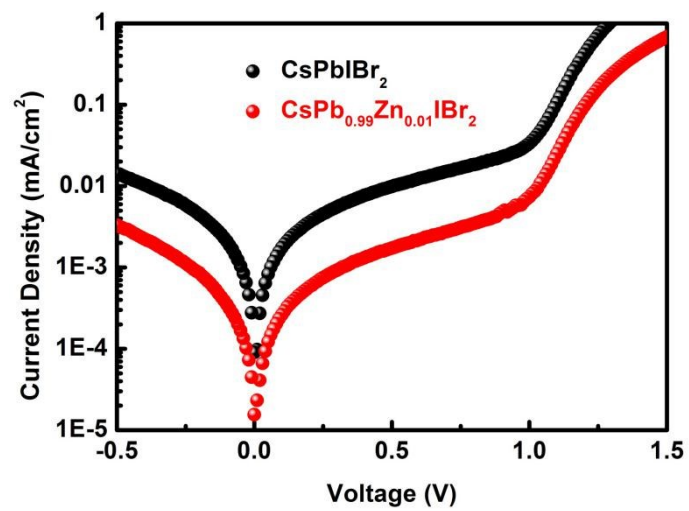

Fig. S9. The dark  $J$ - $V$  curves of the CsPbIBr<sub>2</sub> and CsPb<sub>0.99</sub>Zn<sub>0.01</sub>IBr<sub>2</sub> devices.

**Table S1.** Photovoltaic parameters of CsPbIBr<sub>2</sub> and CsPb<sub>0.99</sub>Zn<sub>0.01</sub>IBr<sub>2</sub> PSCs.

| Device                                                   | Scan direction | $V_{oc}$ (V) | $J_{sc}$ (mA/cm <sup>2</sup> ) | FF   | PCE (%) | HI(%) |
|----------------------------------------------------------|----------------|--------------|--------------------------------|------|---------|-------|
| CsPbIBr <sub>2</sub>                                     | FS             | 1.15         | 8.98                           | 0.61 | 6.29    | 19.77 |
|                                                          | RS             | 1.22         | 10.21                          | 0.63 | 7.84    |       |
| CsPb <sub>0.99</sub> Zn <sub>0.01</sub> IBr <sub>2</sub> | FS             | 1.25         | 11.49                          | 0.65 | 9.34    | 11.13 |
|                                                          | RS             | 1.28         | 11.92                          | 0.69 | 10.51   |       |

**Table S2.** The fitted parameters of carrier lifetimes based on CsPbIBr<sub>2</sub> and CsPb<sub>0.99</sub>Zn<sub>0.01</sub>IBr<sub>2</sub> PSCs.

| device                                                   | $A_1$ | $\tau_1$ (ns) | $A_2$ | $\tau_2$ (ns) | $\tau_{ave}$ (ns) |
|----------------------------------------------------------|-------|---------------|-------|---------------|-------------------|
| CsPbIBr <sub>2</sub>                                     | 84.17 | 1.98          | 15.83 | 11.33         | 2.27              |
| CsPb <sub>0.99</sub> Zn <sub>0.01</sub> IBr <sub>2</sub> | 60.36 | 4.82          | 39.64 | 12.59         | 6.37              |
